# Supplementary material for: Elucidating the nature of Mo species on ZSM-5 and its role in the methane aromatization reaction
Source: Royal Society of Chemistry journal article supplement (doi:10.1039/d1re00044f), 2021-01-01

## Elucidating the nature of Mo species on ZSM-5 and its role in the methane aromatization reaction

Angeles Lopez-Martin, Francisco Platero, Gerardo Colon, Alfonso Caballero

Instituto de Ciencia de Materiales de Sevilla (CSIC-University of Seville) and Departamento de Quimica Inorganica. University of Seville. Av. Americo Vespucio, 49; 41092 Seville, Spain

E-mail: [caballero@us.es](mailto:caballero@us.es)

### Figures

**Figure S1.** Profiles obtained by subtraction of TPRs of Mo/ZSM-5 catalysts.

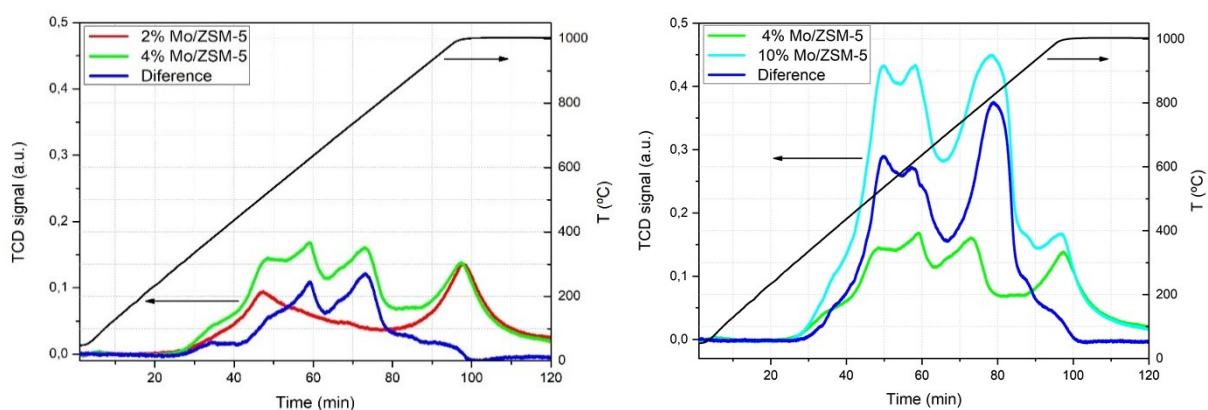

**Figure S2.** HAADF-STEM images of the ZSM-5 support.

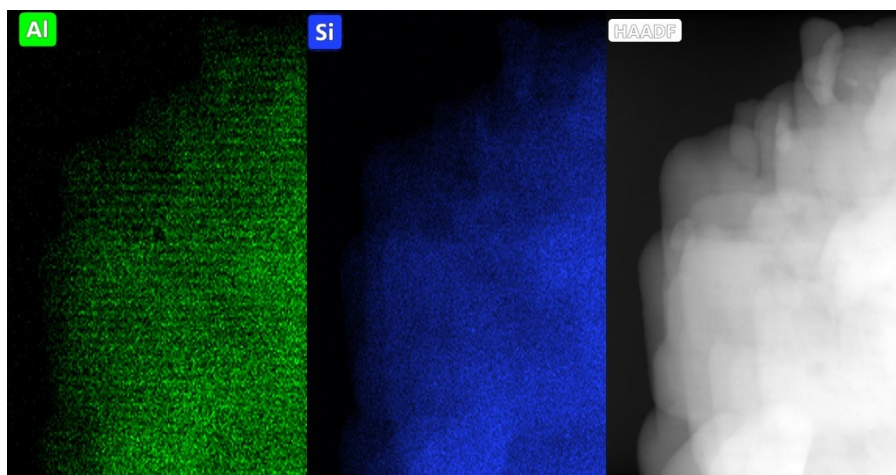

**Figure S3.** TPR profile of a 4% Mo/Al<sub>2</sub>O<sub>3</sub> catalyst.

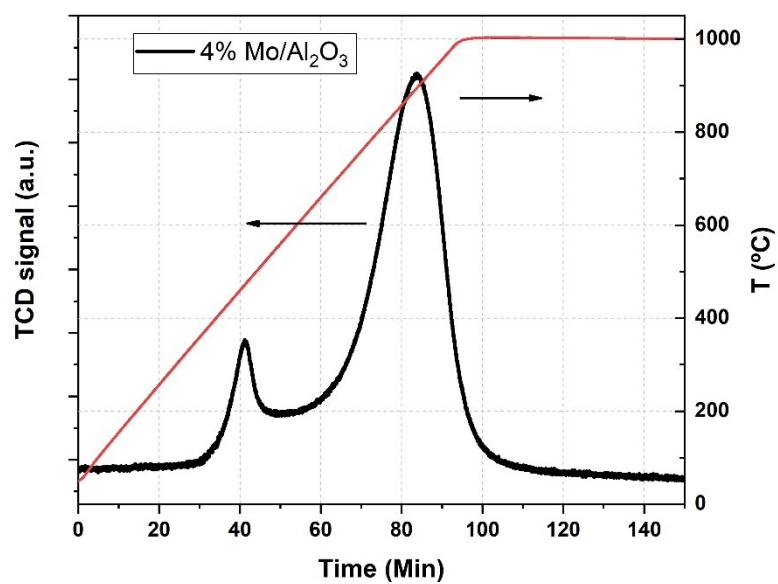

**Figure S4.** XRD patterns for ZSM-5 systems

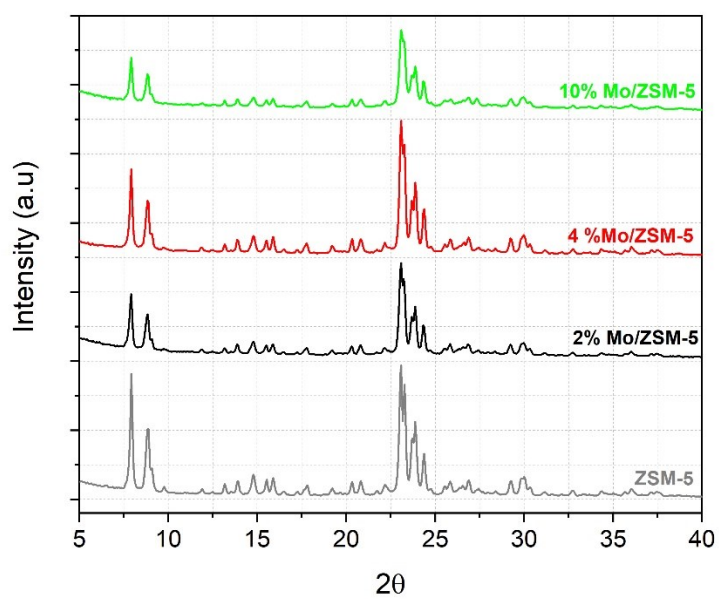

**Figure S5.** DTG profiles of spent 4% and 10% Mo/ZSM-5 catalysts after DAM reaction.

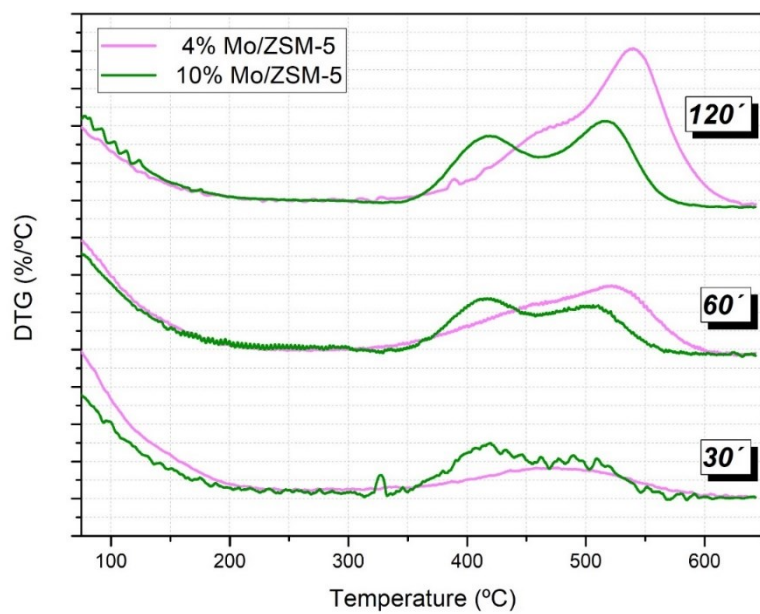

Supplement: d1re00044f1.pdf [file d1re00044f1.pdf]
